# Supplementary material
Source: publisher site journal article supplement (https://www.dovepress.com/article/239513)
Supplement: Supplementary file 1 [file get_supplementary_file.php]

**Anti-inflammatory potential of green synthesized silver nanoparticles of the soft coral *Nephthea sp*. supported by Metabolomics analysis and Docking studies**

**
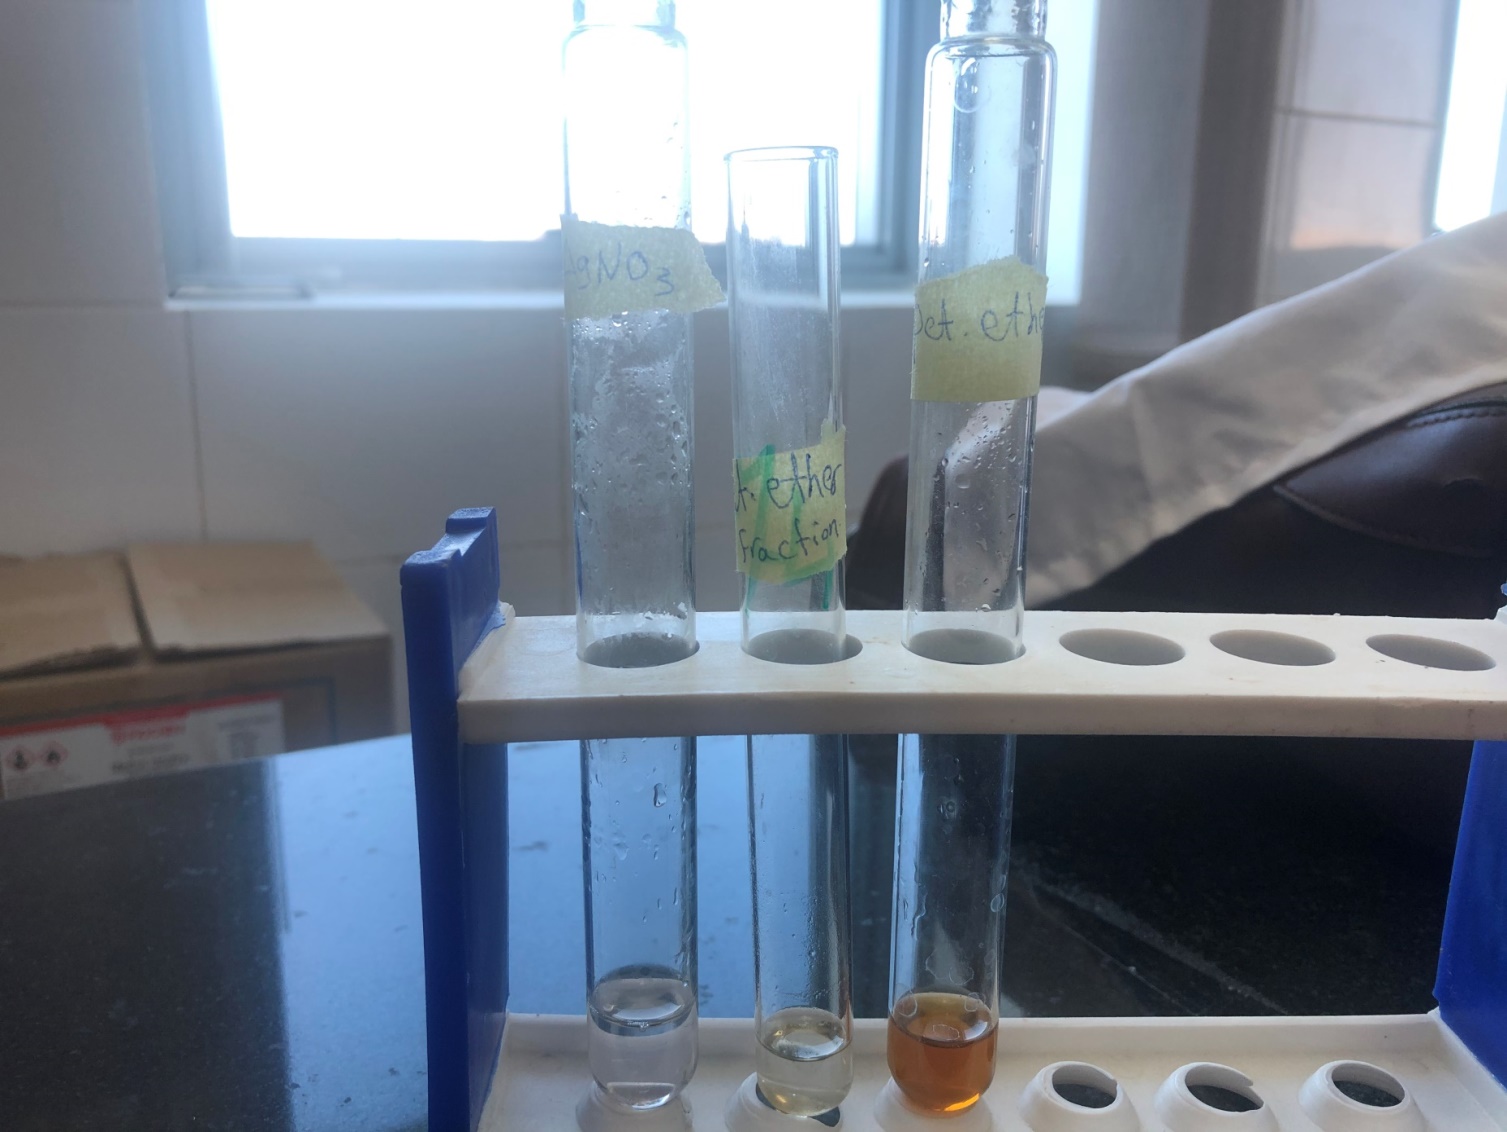

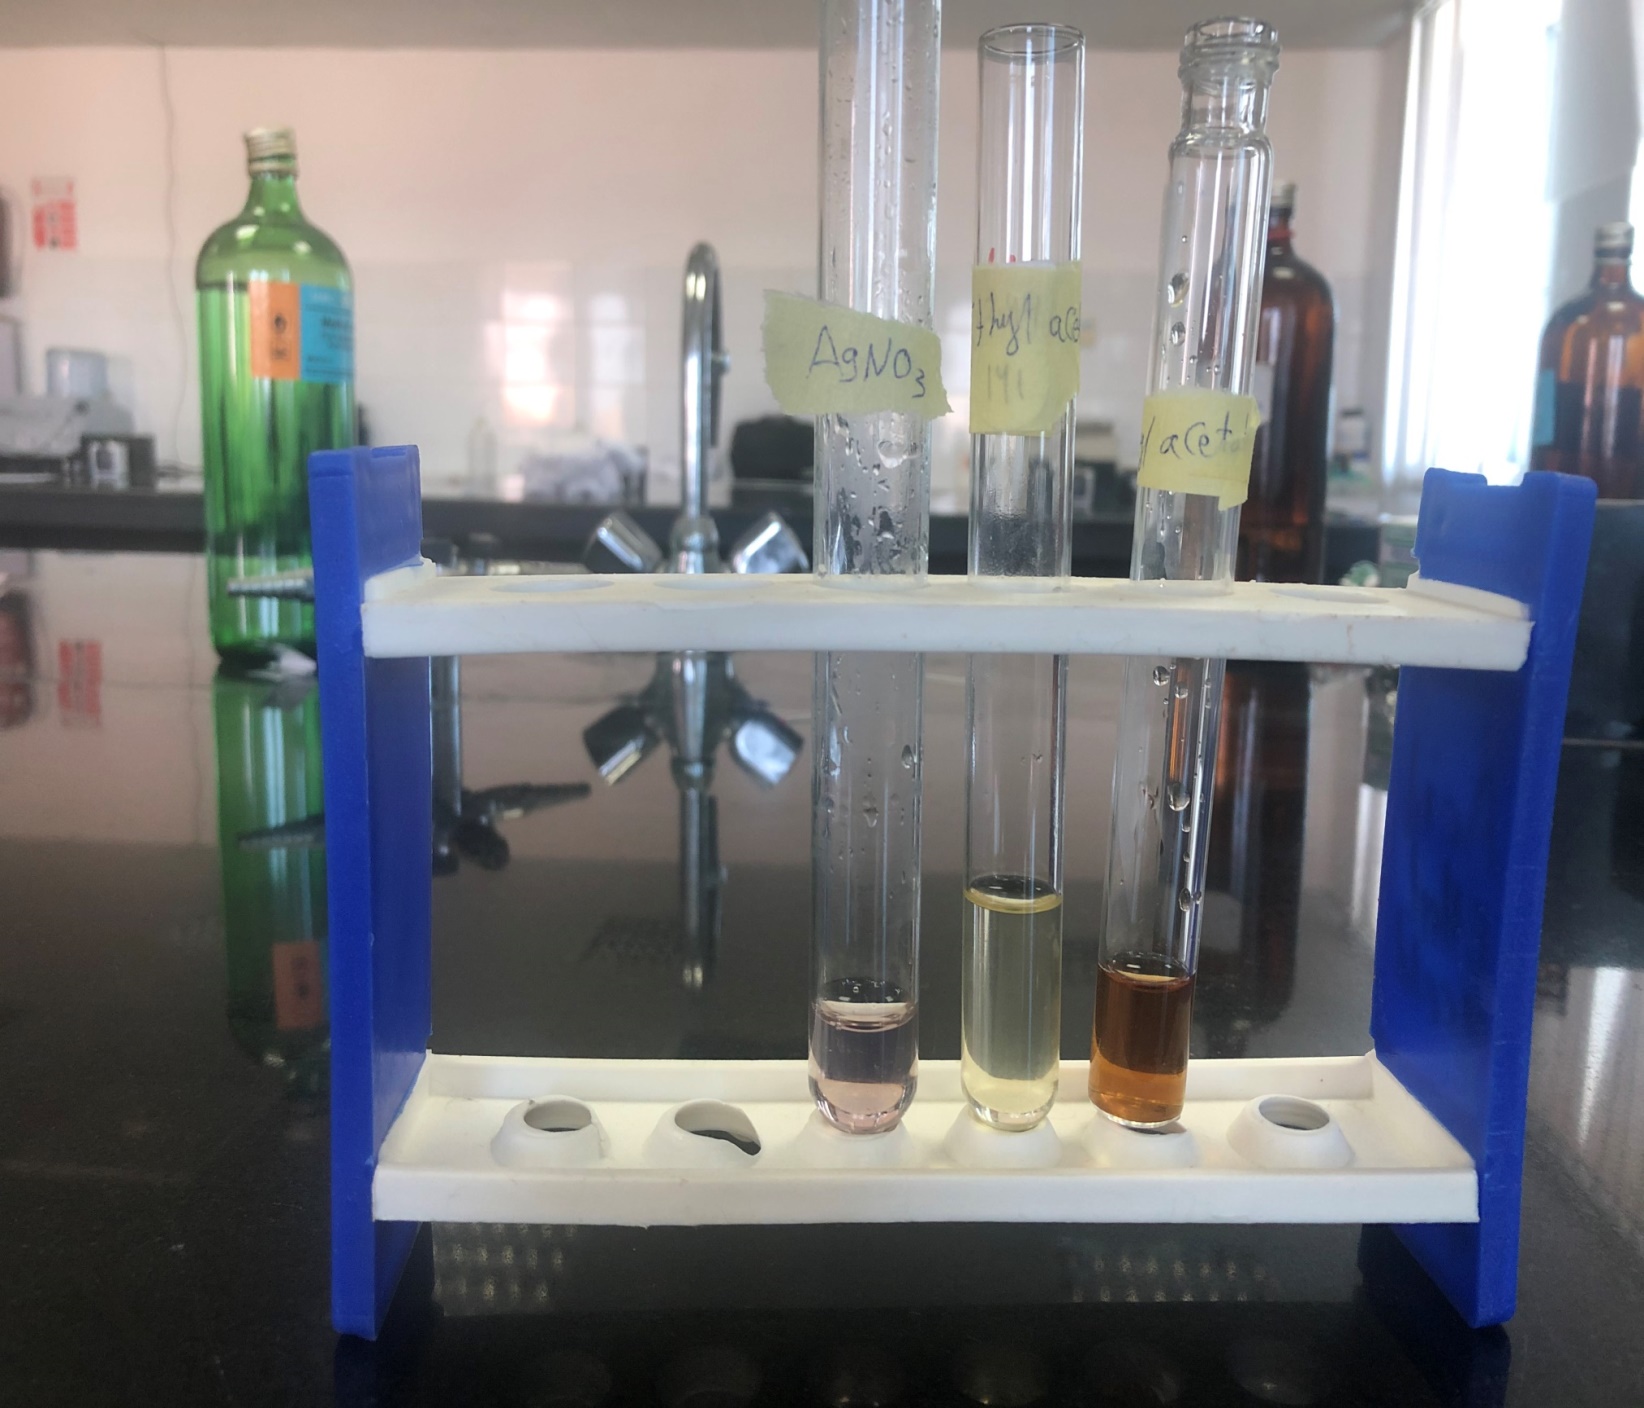
Supplementary material**

**A B**

**Figure S1:** Colour change during the formation of nanoparticles (A), pet. ether fraction, (B) ethyl acetate fraction.

**Table S1:** compounds identified and dereplicated from high resolution mass spectral data sets of the *Nephthea sp.*

| **M/Z** | **Retention time (min.)** | **Molecular weight** | **Name** | **Molecular formula** |
| --- | --- | --- | --- | --- |
| 175.112 | 3.87 | 174.1051 | (4aS*, 8S*)-5, 6, 7, 8-tetrahydro-4a, 8-dimethylnaphthalen-2(4a*H*)-one | C12H16O |
| 215.144 | 7.89 | 214.137 | Furanotriene | C15H18O |
| 217.159 | 3.72 | 216.152 | Cyclocolorenone | C15H22O |
| 233.154 | 4.10 | 232.147 | Lemnalactone | C15H22O2 |
| 235.170 | 3.72 | 234.162 | (2*E*, 6*E*)-3-isopropyl-6-methyl-10-oxoundec-2,6-dienal | C15H24O2 |
| 251.127 | 4.90 | 250.120 | 1(10)-epoxy-2-hydroxy-12-nornardosin-7,11-dione | C14H20O4 |
| 273.148 | 7.35 | 272.141 | 7-acetoxycalamenen-3-one | C17H22O3 |
| 275.163 | 6.24 | 274.155 | Ethyl 5-[(1*E*, 5*Z*)-2, 6-dimethylocta-1, 5, 7-trienyl] furan-3-carboxylate | C17H22O3 |
| 281.138 | 4.92 | 280.131 | Sinularioperoxide E | C15H20O5 |
| 313.164 | 4.29 | 312.157 | Rubifolide | C20H24O3 |

**Table S2:** Results of the *in silico* study of the dereplicated compounds into the active site of COX-1 (pdb code: 5WBE) and COX-2 (pdb code: 5KIR) compared to the co-crystallized ligands.

| **Ligand** | **ΔG (kcal/mol)** | |
| --- | --- | --- |
| **COX-1** | **COX-2** |
| **Mofezolac** | ˗9.5 | ˗ 8.3 |
| **Rofecoxib** | ˗ 7.7 | ˗ 8.6 |
| **1** | ˗ 5.6 | ˗ 5.0 |
| **2** | ˗ 6.1 | ˗ 6.0 |
| **3** | – | ˗ 5.8 |
| **4** | ˗ 5.1 | ˗ 4.6 |
| **5** | ˗ 7.6 | ˗ 7.6 |
| **6** | ˗ 4.7 | ˗ 4.8 |
| **7** | ˗ 7.1 | ˗ 7.6 |
| **8** | ˗ 7.0 | ˗ 7.2 |
| **9** | ˗ 7.2 | ˗ 7.5 |
| **10** | ˗ 6.8 | ˗ 5.8 |
